# Supplementary material
Source: HighWire-hosted journal article supplement (https://bmjopen.bmj.com/content/13/9/e077591)
Supplement: inline-supplementary-material-2 [file inline-supplementary-material-2.pdf]

**Supplementary Table 1:** Diagnosis and procedure codes to assist in baseline medical conditions and pre-existing conditions identification.

| Variables                         | ICD-10 codes                                                                 | CPT/HCPCS codes                                                                                                                              |
|-----------------------------------|------------------------------------------------------------------------------|----------------------------------------------------------------------------------------------------------------------------------------------|
| Overweight & obesity              | E66                                                                          |                                                                                                                                              |
| Tobacco use                       | F17, Z71.6, Z72.0, Z87.891, O99.33, Z87.891, T65.2                           | 99406, 99407, G0375, G0376, G0436, G0437, G9016, G9276, G9458, G8402, G8403, G8453, G8454, S4990, S4991, S4995, S9075, S9453, 4000F or 4001F |
| Alcohol use                       | F10, G31.2, G62.1, G72.1, I42.6, K29.2, K70, K85.2, K86.0, T51, Y91.2, Y91.3 |                                                                                                                                              |
| Non-alcoholic fatty liver disease | K74.60, K76.0, K76.89, K76.9, E88.89                                         |                                                                                                                                              |
| Hypertension                      | I10-I13, I15                                                                 |                                                                                                                                              |
| Diabetes                          | E08, E09, E10, E11, E13, E14                                                 |                                                                                                                                              |
| Ischemic heart disease            | I20-I25                                                                      |                                                                                                                                              |
| Gallstones                        | K80                                                                          |                                                                                                                                              |
| Chronic kidney disease            | N18                                                                          |                                                                                                                                              |
| Congestive heart failure          | I09.9, I11.0, I13.0, I13.2, I25.5, I42.0, I42.5–I42.9, I43.x, I50.x, P29.0   |                                                                                                                                              |
